# Supplementary material for: Does Conservative Kidney Management Offer A quantity or Quality of Life Benefit Compared to Dialysis? A Systematic Review
Source: Research Square preprint supplement (doi:10.21203/rs.3.rs-121179/v1), 2020-12-11

## Additional file 2: Flow Charts for Inclusion and Exclusion of Literature

# Flow chart for guidelines


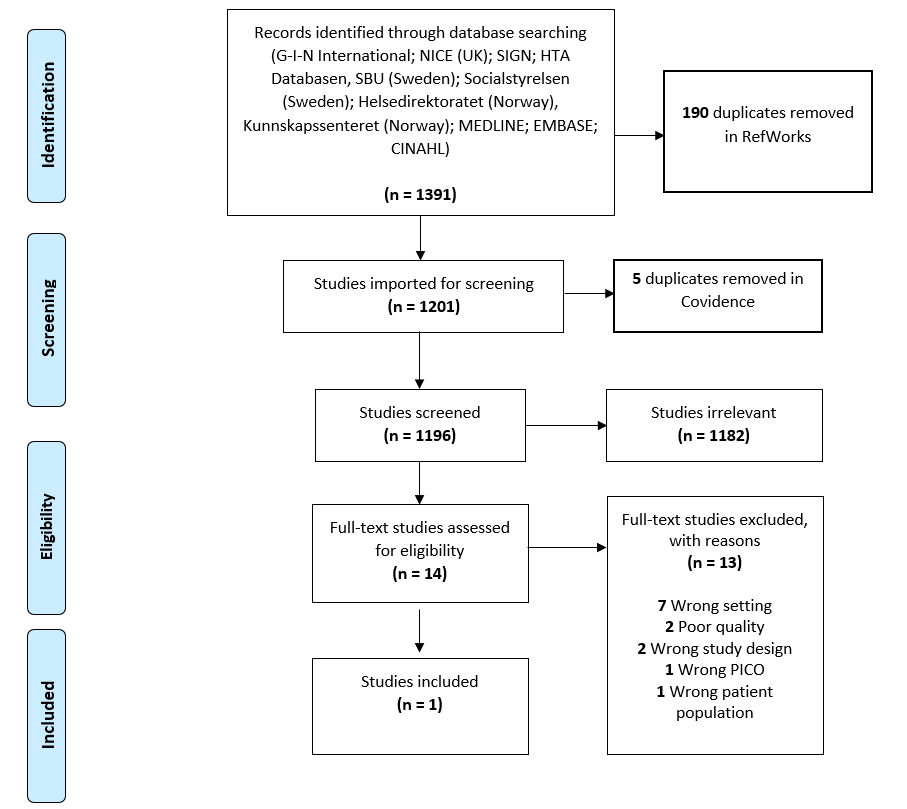


**Flow chart for reviews**


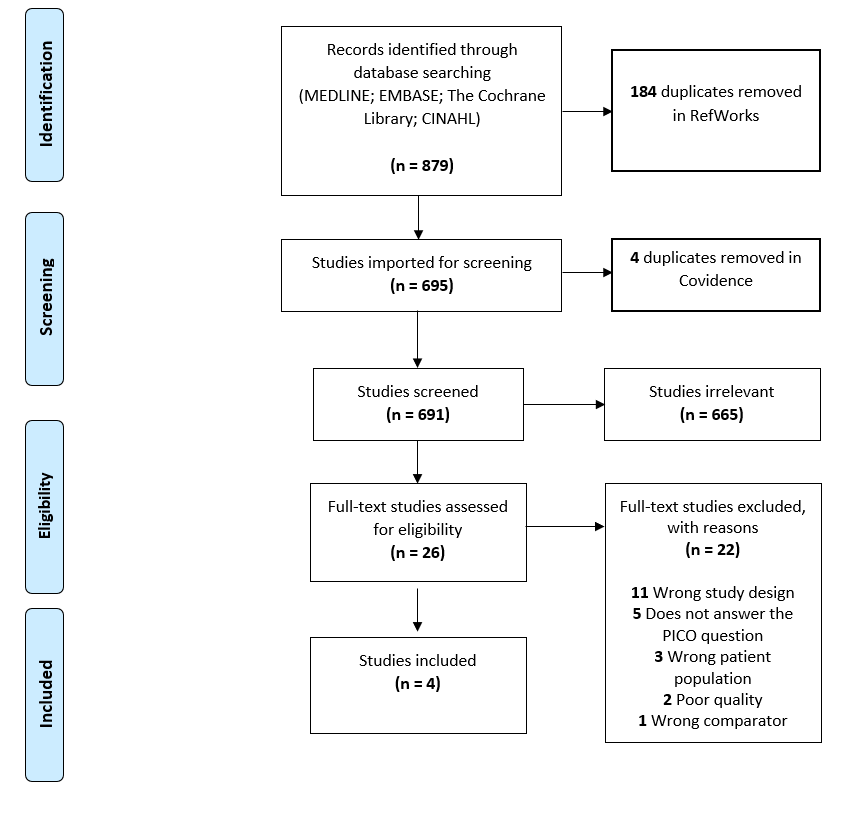

Supplement: Supplementary file 1 [file 7be66c9c61132f5c98e8bd09.docx]
